# Supplementary material for: A convenient approach for antibacterial polypeptoids featuring sulfonium and oligo(ethylene glycol) subunits
Source: Royal Society of Chemistry journal article supplement (doi:10.1039/d0bm01384f), 2020-01-01
Supplement: d0bm01384f1.pdf [file d0bm01384f1.pdf]

Supporting information for

# A Convenient Approach for Antibacterial Polypeptoids Featuring Sulfonium and oligo(ethylene glycol) Subunits

Bo Zhang<sup>1</sup>, Min Li<sup>1</sup>, Min Lin<sup>1</sup>, Xuan Yang<sup>2</sup>, Jing Sun<sup>1\*</sup>

<sup>1</sup>Key Laboratory of Biobased Polymer Materials, College of Polymer Science and Engineering, Qingdao University of Science and Technology, Qingdao, 266042,

China

<sup>2</sup>Shandong Peninsula Engineering Research Center of Comprehensive Brine Utilization, Weifang University of Science and Technology, Shouguang, Weifang,

262700, China

Scheme S1. Synthetic Pathways of Allyl-NCA monomers.

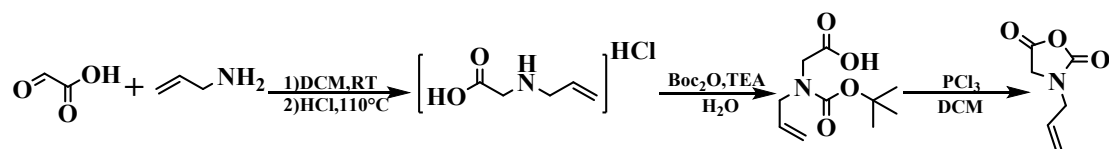

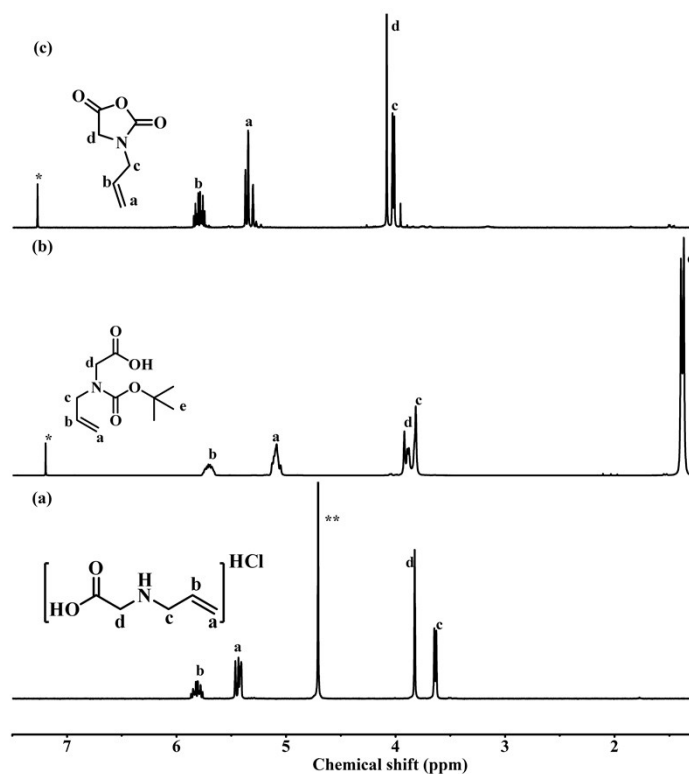

Fig. S1.  $^1\text{H}$  NMR spectra of (a) 2-(Allylamino) acetic Acid Hydrochloride in  $\text{D}_2\text{O}$ , (b) 2-(Allyl(tert-butoxycarbonyl) amino) acetic Acid in  $\text{CDCl}_3$ , (c) allylamine-NCA in  $\text{CDCl}_3$  (\* indicates  $\text{CDCl}_3$ , \*\* indicates  $\text{D}_2\text{O}$ ).

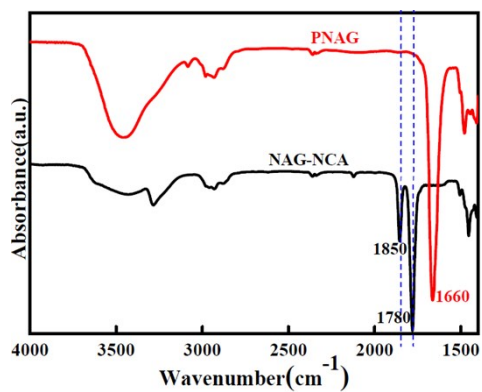

Fig. S2. FTIR spectrums of NAG-NCA and PNAG.

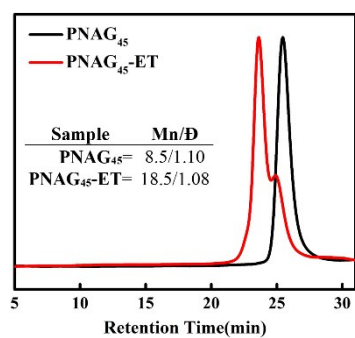

Fig S3. Representative GPC chromatograms of PNAG<sub>45</sub> and PNAG<sub>45</sub>-ET.

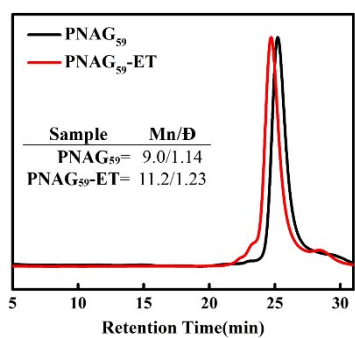

Fig S4. Representative GPC chromatograms of PNAG<sub>59</sub> and PNAG<sub>59</sub>-ET.

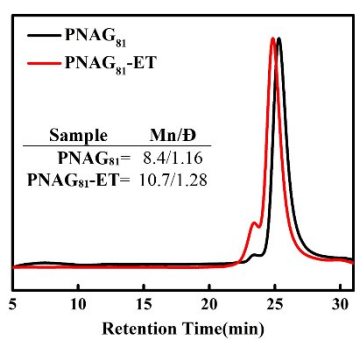

Fig S5. Representative GPC chromatograms of PNAG<sub>81</sub> and PNAG<sub>81</sub>-ET.

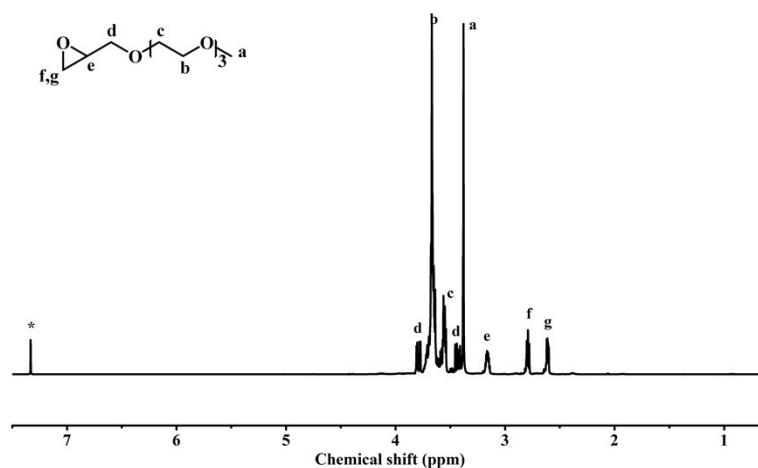

Fig. S6. Representative  $^1\text{H}$  NMR spectrum of epoxide terminated triethylene glycol (OEG<sub>3</sub>) in  $\text{CDCl}_3$  (\* indicates  $\text{CDCl}_3$ ).

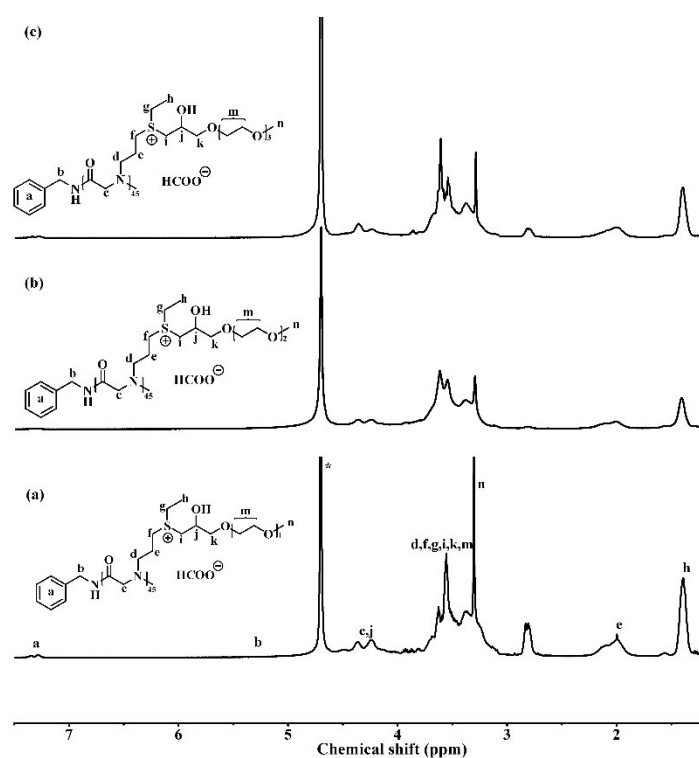

Fig. S7.  $^1\text{H}$  NMR spectra of (a) PNAG<sub>45</sub>-ET-OEG<sub>1</sub>, (b) PNAG<sub>45</sub>-ET-OEG<sub>2</sub> and (c) PNAG<sub>45</sub>-ET-OEG<sub>3</sub> in  $\text{D}_2\text{O}$  (\* indicates  $\text{D}_2\text{O}$ ). (Feed molar ratio of NCA/initiator of the precursor polymer PNAG<sub>45</sub> is 40; DP is 45, determined by  $^1\text{H}$ NMR spectra.)

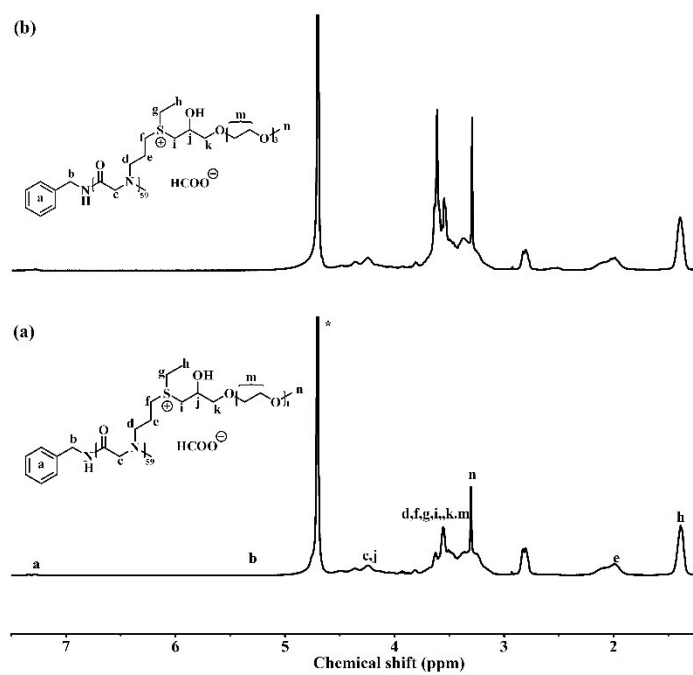

Fig. S8.  $^1\text{H}$  NMR spectra of (a) PNAG<sub>59</sub>-ET-OEG<sub>1</sub> and (b) PNAG<sub>59</sub>-ET-OEG<sub>3</sub> in D<sub>2</sub>O

(\* indicates D<sub>2</sub>O).

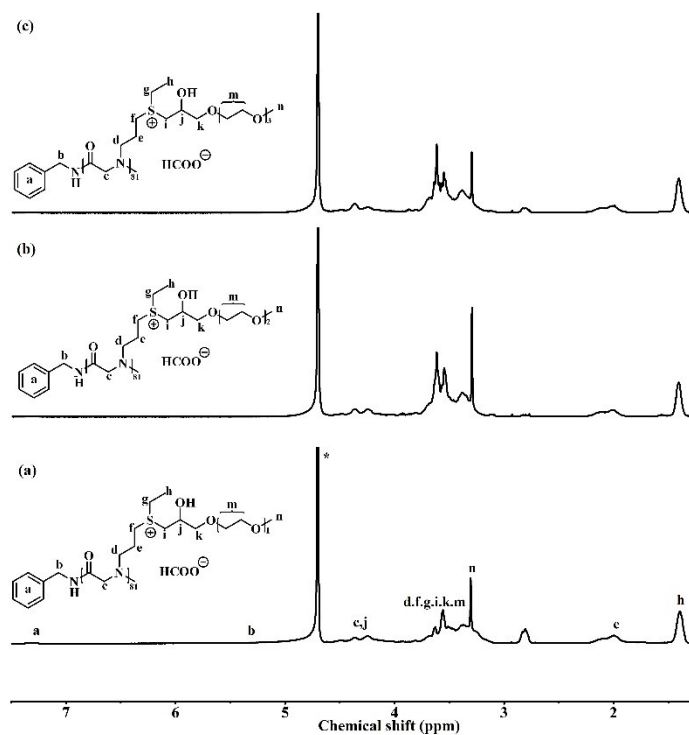

Fig. S9.  $^1\text{H}$  NMR spectra of (a) PNAG<sub>81</sub>-ET-OEG<sub>1</sub>, (b) PNAG<sub>81</sub>-ET-OEG<sub>2</sub> and (c) PNAG<sub>81</sub>-ET-OEG<sub>3</sub> in D<sub>2</sub>O (\* indicates D<sub>2</sub>O). (Feed molar ratio of NCA/initiator of the precursor polymer PNAG<sub>81</sub> is 80; DP is 81, determined by  $^1\text{H}$ NMR spectra.)
